## Noncanonical WNT activation in human right ventricular heart failure

**Authors:** Jonathan J. Edwards, MD<sup>1,2</sup>, Jeffrey Brandimarto MS<sup>2</sup>, Dong-Qing Hu MD<sup>3</sup>, Sunhye Jeong, PhD<sup>2</sup>, Nora Yucel, PhD<sup>2</sup>, Li Li BS<sup>2</sup>, Kenneth C. Bedi Jr., BS<sup>2</sup>, Shogo Wada PhD<sup>2</sup>, Danielle Murashige, BS<sup>2</sup>, Hyun Tae Hwang<sup>3</sup>, PhD, Mingming Zhao, MD<sup>3</sup>, Kenneth B. Margulies MD<sup>2</sup>, Daniel Bernstein MD<sup>3</sup>, Sushma Reddy MD<sup>3</sup>, Zoltan P. Arany MD PhD<sup>2</sup>

### Affiliations

<sup>1</sup>Division of Cardiology (J.J.E.), Children's Hospital of Philadelphia, Philadelphia, PA.

<sup>2</sup>Cardiovascular Institute (J.J.E., J.B., S.J., N.Y., L.L., K.B., S.W., D.B., K.B.M., Z.P.A.), University of Pennsylvania, Perelman School of Medicine, Philadelphia. <sup>3</sup>Division of Cardiology, Lucile Packard Children's Hospital, (D-Q. H, H.T.H., M.Z., D.B., S.R.) Stanford University, Palo Alto, CA.

**Short title:** Noncanonical WNT in human RV failure

### Co-Corresponding Authors:

Zoltan P. Arany

Director, Cardiovascular Metabolism Program

Perelman School of Medicine, University of Pennsylvania, Cardiovascular Institute

3400 Civic Blvd, Philadelphia, PA 19104.

Tel: 215-898-3482

Email: [zarany@pennmedicine.upenn.edu](mailto:zarany@pennmedicine.upenn.edu)

ORCID: 0000-0003-1368-2453

Jonathan J. Edwards

Division of Cardiology

The Children's Hospital of Philadelphia

3401 Civic Center Boulevard, 8NW90 Philadelphia, PA 19104

Tel: 215-590-3548 Fax: 215-590-5825

Email: [EdwardsJ6@email.chop.edu](mailto:EdwardsJ6@email.chop.edu)

ORCID: 0000-0002-8153-7066

**Word Count:** 3270

**Key words:** Right ventricle, Right ventricular failure, heart failure, remodeling, WNT, Calpain

|    |                                    |                                                          |
|----|------------------------------------|----------------------------------------------------------|
| 1  | <b>Non-standard Abbreviations:</b> |                                                          |
| 2  | CST                                | Cell Signaling Technology                                |
| 3  | DCM                                | dilated cardiomyopathy                                   |
| 4  | FLNA                               | filamin A                                                |
| 5  | ICM                                | ischemic cardiomyopathy                                  |
| 6  | LVF                                | left ventricular failure                                 |
| 7  | NF                                 | nonfailing                                               |
| 8  | PAK1                               | p-21 activated kinase                                    |
| 9  | pRV                                | preserved right ventricular function                     |
| 10 | RA                                 | right atrial pressure                                    |
| 11 | RA:PCWP                            | right atrial to pulmonary capillary wedge pressure ratio |
| 12 | RT-PCR                             | real time polymerase chain reaction                      |
| 13 | RV                                 | right ventricle                                          |
| 14 | RVF                                | right ventricular failure                                |

1 **Abstract**

2 **Background:** No medical therapies exist to treat right ventricular (RV) remodeling and RV  
3 failure (RVF), in large part because molecular pathways that are specifically activated in  
4 pathologic human RV remodeling remain poorly defined. Murine models have suggested  
5 involvement of Wnt signaling, but this has not been well defined in human RVF.

6 **Methods:** Using a candidate gene approach, we sought to identify genes specifically expressed  
7 in human pathologic RV remodeling by assessing the expression of 28 WNT-related genes in  
8 the RVs of three groups: explanted nonfailing donors (NF, n = 29), explanted dilated and  
9 ischemic cardiomyopathy, obtained at the time of cardiac transplantation, either with preserved  
10 RV function (pRV, n = 78) or with RVF (n = 35).

11 **Results:** We identified the noncanonical WNT receptor ROR2 as transcriptionally strongly  
12 upregulated in RVF compared to pRV and NF (Benjamini-Hochberg adjusted  $p < 0.05$ ). ROR2  
13 protein expression correlated linearly to mRNA expression ( $R^2 = 0.41$ ,  $p = 8.1 \times 10^{-18}$ ) among all  
14 RVs, and to higher right atrial to pulmonary capillary wedge ratio in RVF ( $R^2 = 0.40$ ,  $p = 3.0 \times 10^{-5}$ ).  
15 We compared RVF with high and low ROR2 expression, and found that high ROR2 expression  
16 was associated with increased expression of the WNT5A/ROR2/ $Ca^{2+}$  responsive protease  
17 calpain, cleavage of its target FLNA, and FLNA phosphorylation, another marker of activation  
18 downstream of ROR2. ROR2 protein expression as a continuous variable, correlated strongly to  
19 expression of calpain ( $R^2 = 0.25$ ), total FLNA ( $R^2 = 0.67$ ), and FLNA phosphorylation ( $R^2 = 0.62$ ,  
20  $p < 0.05$  for all).

21 **Conclusion:** We demonstrate robust reactivation of a fetal WNT gene program, specifically its  
22 noncanonical arm, in human RVF characterized by activation of ROR2/calpain mediated  
23 cytoskeleton protein cleavage.

24  
25 **Abstract word count: 272**

## 1 Introduction

2 Right ventricular failure (RVF) is independently predictive of morbidity and mortality in diverse  
3 disease processes including left ventricular failure (LVF), pulmonary hypertension, and  
4 congenital heart disease [1; 2; 3]. There is a large gap, however, in our understanding and  
5 management of RVF [4]. Multiple studies demonstrate that standard reverse remodeling agents  
6 that unequivocally improve survival for LVF, such as ACE inhibitors and beta-blockers, rarely  
7 have impact in RVF, with sometimes even worsened outcomes [3; 5; 6; 7]. Furthermore,  
8 markers of left ventricular remodeling poorly predict RV dysfunction [8]. Thus, greater  
9 understanding of the fundamental mechanisms that drive RVF, different from LVF, is needed.

10  
11 Evidence suggests that an RV-specific remodeling transcriptional program contributes to this  
12 disparate clinical behavior of the RV and LV [9]. We chose to evaluate *WNT*-related differential  
13 gene expression in human RV remodeling for multiple reasons. Canonical Wnt signaling  
14 regulates cardiomyocyte proliferation during development, and is critical to second heart field  
15 development—which gives rise to the RV—but relatively dispensable for the first heart field—  
16 which gives rise to the LV [10; 11]. In parallel, noncanonical Wnt signaling promotes  
17 developmental cardiomyocyte maturation, and knockout of downstream genes including *Scrib*,  
18 *Vangl2*, or *Rac1* results in second heart field structural anomalies and altered myocardial  
19 patterning and cardiomyocyte cell shape that resemble those seen in pathologic remodeling [12;  
20 13; 14]. In murine models of LVF and *in vitro* cardiomyocyte models, aberrant activation of both  
21 canonical and non-canonical Wnt signaling has been connected to cardiomyocyte hypertrophy,  
22 fibroblast proliferation and activation, activation of cytoskeleton remodeling, and activation of  
23 stress pathways [15; 16; 17; 18; 19]. Unbiased transcriptomics analyses of RVF in mice due to  
24 pressure or volume-overload have identified *WNT* signaling as a pathway that is specifically  
25 altered in the progression from a compensated to decompensated state ([20; 21]. In humans, a  
26 recent study illustrated that higher *WNT5A* serum levels and myocardial expression correlated  
27 with worse RV, but not LV, systolic function and with higher likelihood of death or transplant in  
28 patients with dilated cardiomyopathy (DCM) [22]. Together, these studies have suggested that  
29 embryonic or fetal Wnt expression may be reactivated in RV remodeling, akin to the well-  
30 established reactivation of fetal programs in LV remodeling. However these and other studies  
31 demonstrating aberrant *WNT* signaling in RV remodeling have been limited to transcriptomics in  
32 murine models or were narrowly designed in humans such that the potential clinical role of *WNT*  
33 signaling in adaptive and pathologic remodeling, with associated preserved function (pRV) and  
34 RVF, respectively, remains incompletely defined [20; 21; 22; 23; 24]. Finally, we also focused on  
35 *WNT* signaling because this pathway is dependent on extracellular factors and cell surface  
36 receptors, potentially facilitating prognostic or therapeutic avenues that target *WNT* signaling in  
37 RV remodeling.

38  
39 LVF is an ideal human setting in which to characterize the gene expression signature of  
40 adaptive and pathologic RV remodeling for two reasons. LVF is the most common cause of  
41 RVF, and LVF causes a range of RV involvement—from pRV to RVF—reflecting different types  
42 of adaptive/pathologic RV remodeling or different points in time in disease progression [25; 26].  
43 In this study, we leverage a large collection of human RV tissues from explanted DCM and  
44 ischemic (ICM) hearts, stratified with either pRV or RVF, and from nonfailing (NF) hearts from  
45 human donors, in order to identify a robust reactivation of the fetal noncanonical *WNT* receptor  
46 *ROR2*, upregulation of *ROR2*/ $\text{Ca}^{2+}$  responsive protease calpain, and increased cleavage of  
47 calpain-target cytoskeletal proteins specifically in severe RVF [27; 28; 29]. We propose this  
48 pathway as a potential novel therapeutic target of pathologic RV remodeling.

## 50 Materials and Methods

### 52 Human samples

53 Procurement of all RV myocardial tissue was performed using Gift-of-Life and University of  
54 Pennsylvania Institutional Review Board (approval 802781) approved protocols with informed

1 consent provided when appropriate as previously described.[30] RV myocardial samples were  
2 retrospectively obtained from the Penn Human Heart Tissue Library collected from May 2005 to  
3 April 2018. DCM and ICM hearts were procured at the time of clinical heart transplantation. The  
4 RV functional status (pRV vs. RVF) was identified using pretransplant right atrial (RA) pressure  
5 and RA to pulmonary capillary wedge pressure ratio (RA:PCWP) as this has ratio is predictive of  
6 RVF in the setting of LVF following left ventricular assist device placement in previously  
7 published studies [25; 26]. Four cardiomyopathy RV hemodynamic patient groups were  
8 identified based on RV hemodynamics:

9 DCM-RVF and ICM-RVF:  $RA \geq 9$  and  $RA:PCWP \geq 0.63$

10 DCM-pRV and ICM- pRV:  $RA \leq 8$  and  $RA:PCWP \leq 0.37$ .

11 Exclusion criteria included prior ventricular assist device, retransplantation, incomplete  
12 hemodynamics, or insufficient RV tissue for analysis. Potential clinical confounders to  
13 differential gene expression were assessed using chi square analysis test for categorical  
14 variables and Mann-Whitney U for continuous variables with pairwise deletion for any missing  
15 data. Glomerular filtration rate was calculated using the MDRD equation. All reported p values  
16 were adjusted using the Benjamini-Hochberg multiple comparison correction method (adjusted  
17  $P < 0.05$  for significance).

18  
19 Disease groups were compared to a NF cohort, selected from unused Gift-of-Life donor hearts  
20 that were deemed unsuitable for transplantation as previously described.[30] We enriched for  
21 normal RV function by selecting those with confirmed minimal tricuspid insufficiency, preserved  
22 left ventricular function by ejection fraction  $\geq 50\%$ , and preserved renal function by creatinine  $\leq$   
23 1.2.

#### 24 25 RNA expression

26 Total RNA was extracted from coded frozen human tissue samples using RNeasy Mini Kit  
27 (Qiagen Hilden, Germany). RNA samples were diluted to 100 ng/uL by DEPC water using Qubit  
28 fluorometer (Thermo Fisher Scientific Waltham, MA). Human cDNA was synthesized using  
29 MultiScribe Reverse Transcriptase<sup>TM</sup> (Thermo Fisher Scientific). Gene expression was  
30 quantified using SYBR Green Master Mix RT-PCR. RT-PCR primers (sequences in  
31 **Supplemental Table 1**) were validated using primer efficiency and melt curve analyses.  
32 Log2fold changes were calculated using the housekeeping genes GAPDH and TBP. Candidate  
33 genes were first assessed for differential expression in both DCM and ICM using Kruskal-Wallis  
34 test to compare log2fold (adjusted  $p < 0.05$ ) between NF/pRV/RVF for both the DCM and ICM  
35 cohorts. Genes that were differentially expressed for both DCM and ICM were assessed for  
36 differential expression between pRV and RVF using Mann Whitney test after combining DCM  
37 and ICM groups.

#### 38 39 Protein expression

40 Genes that demonstrated statistically significant differential expression between pRV and RVF  
41 were further assessed using western blot to evaluate differential protein expression. As a  
42 preliminary analysis, four representative samples from each group were selected using the  
43 lowest and highest RA:RPCW ratio for pRV and RVF, respectively, and the lowest NPPA  
44 expression for the NF controls. Protein extraction was performed using NE-PER<sup>TM</sup> kit  
45 (ThermoFisher Scientific) to separate cytoplasmic and nuclear fractions. Equal amount  
46 cytoplasmic or nuclear protein according to predicted protein location from each sample was  
47 separated by SDS-PAGE. Western blot was performed using monoclonal antibodies to the  
48 following targets: CREBBP (Cell Signaling Technology (CST) Danvers, MA, cat D6C5),  
49 NFATC2 (Abcam, Cambridge, UK, cat ab2722), ROR2 (CST cat D3B6F), TBP (Abcam, cat  
50 ab51841), HDAC2 (Abcam, cat ab32117), and GAPDH (CST, cat D16H11). Given preliminary  
51 results demonstrating significant upregulation of ROR2, western blots were performed for all  
52 remaining samples. In a subset of RVF samples with either highest ( $n = 6$ ) or lowest ( $n = 6$ )  
53 ROR2 expression, we performed total protein extraction using RIPA to explore activation of  
54 downstream pathways. Western blot was performed using antibodies to filamin A (FLNA, CST

1 cat 4762), serine-2152 phosphorylated FLNA (CST cat 4761), calpain (CST cat 2556),  
2 phosphorylated PAK1 (CST cat 2601), and spectrin (Biolegend, San Diego, CA cat D8B7).  
3 Secondary anti-mouse (CST cat 7076) and anti-rabbit (CST cat 7074) were used as indicated.  
4 Densitometry was assessed using SuperSignal™ West Femto enhanced chemiluminescent  
5 substrate (ThermoFisher Scientific) and ImageStudio (LI-COR Biotechnology, Lincoln,  
6 Nebraska).

## 7 8 Statistics

9 All data was analyzed using RStudio version 1.1.463. Data are presented as median  
10 (interquartile range), count (%), or adjusted  $R^2$  for correlations. Pairwise deletion was performed  
11 for any missing clinical data. Statistical significance was determined using Mann Whitney U or  
12 Kruskal-Wallis, where appropriate, for continuous variables, and chi square for categorical  
13 variables. All reported p values were adjusted using the Benjamini-Hochberg multiple  
14 comparison correction method (adjusted  $P < 0.05$  for significance).

## 15 16 **Results**

### 17 Patient characteristics

18 We collected RV myocardial tissue from patients undergoing clinical heart transplantation for  
19 LVF due to DCM or ICM and separated them according to the presence of pRV or RVF using  
20 preexplant hemodynamic data, as described in the methods. Median time between  
21 hemodynamic data collection and explantation was 28.5 days (interquartile range: 13 – 53  
22 days). In total, we identified 47 DCM-pRV, 26 DCM-RVF, 31 ICM-pRV, and 9 ICM-RVF,  
23 representing the largest and most clinically diverse study of human RV differential gene  
24 expression in LVF to date.

25  
26 We identified no clinical confounders between DCM-pRV/DCM-RVF, ICM-pRV/ICM-RVF, and  
27 combined pRV/RVF groups (**Table 1** and **Supplemental Table 2**), including no differences in  
28 gender, age, ethnicity, body surface area, body weight, heart weight, renal function by  
29 glomerular filtration rate, diabetes, use of reverse remodeling agents collectively or individually  
30 (ACE inhibitor, angiotensin receptor blocker, or  $\beta$ -blocker), use of other cardioactive medications  
31 (digoxin, diuretics, calcium channel blockers, or milrinone), lipid lowering medications, thyroid  
32 medications, or pacemakers. Also, ICM-RVF hearts were no more likely to have significant right  
33 coronary artery disease ( $\geq 70\%$  stenosis) or history of prior coronary intervention compared to  
34 their ICM-pRV counterparts, indicating that any observed transcriptional changes could not be  
35 attributable to dichotomous coronary involvement.

36  
37 The NF group was similarly well matched across all four cardiomyopathy hemodynamic groups  
38 with respect to age, ethnicity, body surface area, and weight, although not for gender  
39 (**Supplemental Table 3**). Previous unbiased studies of cardiac DGE have demonstrated few  
40 gender-specific differences, and none in WNT-related gene expression, suggesting a low  
41 likelihood that gender differences would impact our findings [31].

### 42 43 WNT Pathway Candidate Gene Analysis

#### 44 RNA expression

45 In total, we assessed the RV myocardial expression of 28 WNT-related genes including ligands,  
46 receptors and co-receptors, inhibitors, and downstream signaling and transcriptional targets that  
47 have been either previously implicated in RV remodeling in murine models of RVF or have a  
48 known interaction based on literature review (**Supplemental Table 3**). First, we assessed  
49 whether these 28 WNT-related genes and two well described heart failure genes—NPPA and  
50 NPPB—exhibited differential expression between NF/pRV/RVF separately for both DCM and  
51 ICM using Kruskal-Wallis to compare  $\log_2$ fold changes.[32] Most WNT-related genes  
52 (**Supplemental Table 4**) and both natriuretic peptides demonstrated statistically significant  
53 differential expression in at least DCM or ICM, with 12 demonstrating differential expression in  
54 both: AXIN2, CREBBP, DAAM2, FZD1, FZD7, NFATC2, NPPA, ROR2, SFRP1, SFRP3,



1 WISP2, and WNT10B. Of these 12, only five genes were found to be differentially expressed  
2 between pRV and RVF: CREBBP, NFATC2, NPPA, ROR2, and WISP2 (**Table 2, Figure 1**). To  
3 further prioritize these candidate genes, we performed linear regressions comparing RNA  
4 expression to RA:PCWP and found that ROR2 ( $R^2 = 0.16$ ,  $p = 3.2 \times 10^{-5}$ ), CREBBP ( $R^2 = 0.03$ ,  
5  $p = 0.048$ ), and NFATC2 ( $R^2 = 0.03$ ,  $p = 0.048$ ) had modest correlations with the RA:PCWP,  
6 while WISP2 did not ( $R^2 = 0.01$ ,  $p = 0.14$ ).

### 7 8 Protein expression

9 To assess whether protein expression would correlate with the observed transcriptional  
10 upregulation of CREBBP, NFATC2, and ROR2 in RVF, we first performed a preliminary analysis  
11 comparing four representative samples from each group representing the hemodynamic  
12 extremes for pRV and RVF and the lowest NPPA expression for NF. In this preliminary analysis,  
13 strong ROR2 protein expression was observed in the DCM-RVF samples with minimal  
14 expression in the other groups (**Supplemental Figure 1**). A similarly dramatic relationship was  
15 not observed for the other targets; we thus prioritized ROR2 for protein expression analysis in  
16 the remaining 123 samples.

17  
18 ROR2 protein expression in all 143 samples correlated strongly with RNA expression ( $R^2 =$   
19  $0.41$ ,  $p = 8.1 \times 10^{-18}$ ). Median and average RVF-to-pRV fold increase in protein expression were  
20 2.0 and 4.5, respectively, ( $p < 0.05$ , **Figure 2**). Furthermore, particularly within the RVF group,  
21 ROR2 protein expression increased linearly with higher RA:PCWP ( $R^2 = 0.40$ ,  $p = 3.0 \times 10^{-5}$ ,  
22 **Figure 2**). Finally, by using the NF ROR2 RNA and protein expression to establish normative  
23 ranges, RVF samples demonstrated a greater than 3-fold odds (95<sup>th</sup> percentile confidence  
24 intervals) of expressing ROR2 above the 95<sup>th</sup> percentile compared to pRV (protein: OR 3.07  
25 (1.1 – 8.4),  $p = 0.03$ ; RNA: OR 3.18 (1.4 – 7.3),  $p = 0.0071$ ). In summary, ROR2 expression,  
26 both RNA and protein, correlates directly with RVF categorically, and with worse RV  
27 hemodynamics.

### 28 29 Impact of ROR2 expression in RVF

#### 30 *ROR2 expression correlates with actin cytoskeletal remodeling pathways*

31 We next explored what functional impact higher ROR2 expression might have in the setting of  
32 RVF by assessing overall expression and phosphorylation of downstream targets, focusing on  
33 cytoskeletal remodeling pathways. Normalized to GAPDH, we found a roughly 1.5 to 2-fold  
34 increase in calpain, full length FLNA, and full length spectrin protein expression in high ROR2  
35 expressing RVF patients compared to low ROR2 expression (**Figure 3 and Table 3**,  $p < 0.05$ ,  
36 for all). Similarly, we identified an almost 8- and 3-fold increase in the calpain cleavage-  
37 mediated FLNA (180 kDa) and spectrin (150 kDa) breakdown products, respectively.  
38 Phosphorylation of FLNA serine-2152 modulates its mechanosensitive interaction with integrin  
39 and inhibits calpain-mediated cleavage, and ROR2 overexpression in HEK293 cells was found  
40 to activate one of the known kinases for this site—p21-activated kinase (PAK1)—through a  
41 presumed indirect phosphorylation.[33; 34; 35] We therefore assessed the relationship of ROR2  
42 expression, FLNA phosphorylation, and phosphorylated PAK1 expression. In high ROR2  
43 expressing RVF samples, we observed a nearly 10-fold increase in FLNA phosphorylation  
44 normalized to total FLNA and a 2-fold increase in phosphorylated PAK1 normalized to GAPDH  
45 ( $p < 0.05$ , both). Given these consistent relationships observed categorically for high and low  
46 ROR2 expression, we next assessed whether expression of these targets correlated linearly or  
47 logarithmically with ROR2 expression (**Figure 3 and Table 3**). The most statistically significant  
48 correlation observed was a logarithmic increase in phosphorylated PAK1 with increasing ROR2  
49 expression ( $R^2 = 0.83$ ,  $p = 1.4 \times 10^{-4}$ ). Full length and phosphorylated FLNA also correlated  
50 significantly in a logarithmic relationship with ROR2 expression ( $R^2 = 0.67$  and  $0.62$ ,  
51 respectively,  $p < 0.003$ ). Calpain expression correlated linearly with ROR2 expression ( $R^2 = 0.66$ ,  
52  $p = 0.0018$ ). In summary, within the context of RVF, high ROR2 expression correlates with  
53 calpain expression and calpain-mediated cleavage as well as an increase in total FLNA, FLNA  
54 phosphorylation, and total spectrin expression.

## Discussion

To date, there are no evidence-supported therapies that target RVF [9]. Our lack of understanding of the molecular mechanisms that regulate RV remodeling in humans, particularly with respect to adaptive compared to pathologic remodeling, remains a significant barrier towards achieving this goal. Here, we find compelling evidence that non-canonical WNT signaling, and in particular ROR2 signaling, is aberrantly activated in human RVF.

ROR2 is a cell surface receptor tyrosine kinase that transmits noncanonical WNT signaling following binding of its only known ligand—WNT5A—via planar cell polarity, WNT/Ca<sup>2+</sup>, and stress pathways including JNK/cJUN [36]. ROR2 is broadly expressed during embryogenesis, being critical to cardiac, skeletal, and sympathetic nervous system development, but is silent in most healthy postnatal tissue [27; 28; 37]. Global knockout of *Ror1* reveals no apparent defects in the developing mouse, but knockout of *Ror2* resulted in ventricular septal defects and knockout of both *Ror2* and *Ror1* led to conotruncal type congenital heart defects [27]. Interestingly, upon our review of their published histology, we noted a significantly noncompacted appearance to the RV and LV myocardium only in the double knockout, which suggests *Ror1/2* play a role in myocardial development similar to other noncanonical WNT genes (e.g. disorganized and noncompacted myocardium with loss of *Daam1*, *Scrib1*, or second heart field-specific loss of *Rac1*) [12; 13; 14]. ROR2 in disease has been largely studied in the context of tumors, where WNT5A/ROR2 signaling leads to activation of calpain-mediated cleavage, cytoskeletal rearrangement for purposes of migration, and as a hypoxia-inducible factor downstream of *VHL/HIF* signaling with implications in tumor invasiveness and metastasis [29; 38; 39]. To date, little is known about the role of ROR2 reactivation in cardiac pathology. In a rat left anterior descending ligation myocardial infarction model, increased protein levels of *Wnt5a*, *Ror2*, and *Vangl2*—one if its immediate downstream targets—were observed in the remote vital area [40]. Using neonatal rat ventricular myocytes (NRVMs), the authors identified phosphorylation of cJun and Jnk as mediators of this activation. Another group found that *Wnt5a* stimulation of NRVMs caused hypertrophy, cytoskeletal rearrangement, and mPTP opening, but any dependence on *Ror2* or other known *Wnt5a* receptors was not tested [41]. Our results are thus consistent with, and expand on, what few mechanistic data exist on the role of ROR2 in myocardial remodeling, and suggest that ROR2 induction in RVF mechanistically contributes to the pathogenesis of human RVF.

By comparing RVF with high and low ROR2 expression, we found evidence that in the context of RVF ROR2 activation leads to increased calpain-mediated cleavage of FLNA. FLNA is a large scaffolding cytoskeletal protein that is involved in broad cellular functions including maintaining cell and tissue structure (e.g. cross-linking actin filaments, binding integrin, maintaining adherens junctions), cell migration, and as a signaling molecule via nuclear translocation of cleaved fragments [42]. Loss of FLNA in humans or mice causes early lethality with diverse and severe developmental defects affecting the heart, lung, neurologic system, and skeleton [43]. Of note, severe RV myocardial noncompaction has been previously reported in a patient with a *FLNA* G1728C mutation [44]. FLNA has been connected to ROR2 in cells other than cardiomyocytes. For example, in melanoma cells, ROR2-FLNA interaction is critical for WNT5A-induced JNK phosphorylation, cytoskeleton remodeling, and cell migration, and WNT5A-ROR2 binding induces calpain expression and its cleavage of FLNA leading to increased invasiveness [29; 45]. Importantly, there is also evidence that calpain contributes to pathologic RV remodeling. In an acute pressure overload-induced rabbit RVF model, direct right coronary artery infusion of the selective calpain inhibitor MDL-28710 partially rescued RV function and reduced cleavage of the cytoskeletal protein talin [46]. Thus, our findings of ROR2 induction and activation of its downstream pathways, suggest a model (**Figure 4**) whereby an embryonic WNT5a/ROR2 program is reactivated in the setting of RVF, which then promotes calpain-mediated cleavage of FLNA and likely other targets, ultimately leading to maladaptive cytoskeletal changes and worsening RVF.



1  
2  
3  
4  
5  
6  
7  
8  
9  
10  
11  
12  
13  
14  
15  
16  
17  
18  
19  
20  
21  
22  
23  
24  
25  
26  
27  
28  
29  
30  
31  
32  
33  
34  
35  
36  
37  
38  
39  
40  
41  
42  
43  
44  
45  
46  
47  
48  
49  
50  
51  
52  
53

## Limitations

There may have been some disease progression or clinical deterioration in the time interval between tissue collection and hemodynamic assessments for DCM and ICM RV, although if so, such changes would likely have introduced variability and weakened our differential expression analyses. It is also possible that changes in gene expression occurred during the period between heart harvest and tissue freezing, although this process is highly controlled by the Penn Human Heart Tissue Library with standard operating procedures including assiduous adherence to cold cardioplegia and snap freezing samples in liquid nitrogen. Our use of rare human-derived tissue allowed us to examine differential expression in a natural setting, but it did limit our ability to mechanistically evaluate the impact of altered ROR2 expression. Thus, further work will be necessary such as testing the response to RV pressure or volume overload in Ror2 gain-of-function and loss-of-function mice.

## Conclusions

In this study, using one of the largest and most diverse existing libraries of human heart tissue, we found that WNT signaling is broadly dysregulated in RV remodeling in the setting of ICM and DCM. We found a large reactivation of embryonic ROR2 RNA and protein expression in RVF, which correlated with worse RV hemodynamics, and with activation of a downstream pathway of increased calpain expression and FLNA cleavage. Taken together, the data reveal the robust activation of noncanonical WNT signaling in human RVF, and identify ROR2 as a potential novel RVF therapeutic target that may suppress cytoskeletal remodeling.

## Data Availability Statement

All datasets generated and analyzed for the current study are available in supplementary material.

## Ethics Statement

Procurement of all RV myocardial tissue was performed using Gift-of-Life and University of Pennsylvania Institutional Review Board (approval 802781) approved protocols with informed consent provided when appropriate. The authors attest they are in compliance with human studies committees of the authors' institutions and Food and Drug Administration guidelines, including patient consent where appropriate.

## Author contributions

Conceptualization and Design (JJE, KBM, DB, SR, ZPA). Acquisition of data (JJE, JB, LL, DQH, KCB, DM, HTH, MZ). Analysis and interpretation of data (JJE, JB, SJ, NY, SW, SR, ZPA). Writing and editing of manuscript (JJE, SJ, KBM, SR, ZPA).

## Conflicts of Interest

The authors have no relationships relevant to the content of this paper to disclose.

## Acknowledgements

The authors acknowledge all patients and donors who provided tissue without which this study could not have been performed. The authors acknowledge the Gift-of-Life Donor Program Philadelphia, PA who helped provide access to nonfailing tissue from unused donor hearts. A previous version of this manuscript was submitted to the preprint server medRxiv (<https://doi.org/10.1101/2020.07.03.20134965>).

## Sources of Funding

This study was supported by grants from NIH and National Heart, Lung, and Blood Institute (NHLBI) 152446 (to Z.P.A.), K08 HL127277-01 (to S.R.), and R01 HL105993 (to K.B.M), and Department of Defense W81XWH18-1-0503 (to Z.P.A.) and PR151448 (to DB and SR). JJE

1 was supported by NIH 5T32HL007915, Matthew's Heart of Hope, and Congenital Heart Disease  
2 Coalition.  
3

## References

- [1] S.A. van Wolferen, J.T. Marcus, A. Boonstra, K.M. Marques, J.G. Bronzwaer, M.D. Spreeuwenberg, et. al., Prognostic value of right ventricular mass, volume, and function in idiopathic pulmonary arterial hypertension. *Eur Heart J* 28 (2007) 1250-7.
- [2] S. Piran, G. Veldtman, S. Siu, G.D. Webb, and P.P. Liu, Heart failure and ventricular dysfunction in patients with single or systemic right ventricles. *Circulation* 105 (2002) 1189-94.
- [3] S.V. Babu-Narayan, A. Uebing, P.A. Davlouros, M. Kemp, S. Davidson, K. Dimopoulos, et. al., Randomised trial of ramipril in repaired tetralogy of Fallot and pulmonary regurgitation: the APPROPRIATE study (Ace inhibitors for Potential PRevention Of the deleterious effects of Pulmonary Regurgitation In Adults with repaired TEtralogy of Fallot). *Int J Cardiol* 154 (2012) 299-305.
- [4] N.F. Voelkel, R.A. Quaife, L.A. Leinwand, R.J. Barst, M.D. McGoon, D.R. Meldrum, et al., Molecular Mechanisms of Right Heart, Right ventricular function and failure: report of a National Heart, Lung, and Blood Institute working group on cellular and molecular mechanisms of right heart failure. *Circulation* 114 (2006) 1883-91.
- [5] L. Dos, S. Pujadas, M. Estruch, A. Mas, I. Ferreira-Gonzalez, A. Pijuan, et. al., Eplerenone in systemic right ventricle: double blind randomized clinical trial. The evedes study. *Int J Cardiol* 168 (2013) 5167-73.
- [6] A.R. Doughan, M.E. McConnell, and W.M. Book, Effect of beta blockers (carvedilol or metoprolol XL) in patients with transposition of great arteries and dysfunction of the systemic right ventricle. *Am J Cardiol* 99 (2007) 704-6.
- [7] R.E. Shaddy, M.M. Boucek, D.T. Hsu, R.J. Boucek, C.E. Canter, L. Mahony, et. al., Pediatric Carvedilol Study, Carvedilol for children and adolescents with heart failure: a randomized controlled trial. *JAMA* 298 (2007) 1171-9.
- [8] T.G. di Salvo, K.C. Yang, E. Brittain, T. Absi, S. Maltais, and A. Hemnes, Right ventricular myocardial biomarkers in human heart failure. *J Card Fail* 21 (2015) 398-411.
- [9] S.L. Roche, and A.N. Redington, Right ventricle: wrong targets? Another blow for pharmacotherapy in congenital heart diseases. *Circulation* 127 (2013) 314-6.
- [10] E.D. Cohen, Z. Wang, J.J. Lepore, M.M. Lu, M.M. Taketo, D.J. Epstein, et. al., Wnt/beta-catenin signaling promotes expansion of Isl-1-positive cardiac progenitor cells through regulation of FGF signaling. *J Clin Invest* 117 (2007) 1794-804.
- [11] A. Pahnke, G. Conant, L.D. Huyer, Y. Zhao, N. Feric, and M. Radisic, The role of Wnt regulation in heart development, cardiac repair and disease: A tissue engineering perspective. *Biochem Biophys Res Commun* 473 (2016) 698-703.
- [12] C. Leung, X. Lu, M. Liu, and Q. Feng, Rac1 signaling is critical to cardiomyocyte polarity and embryonic heart development. *J Am Heart Assoc* 3 (2014) e001271.
- [13] H.M. Phillips, H.J. Rhee, J.N. Murdoch, V. Hildreth, J.D. Peat, R.H. Anderson, et. al., Disruption of planar cell polarity signaling results in congenital heart defects and cardiomyopathy attributable to early cardiomyocyte disorganization. *Circ Res* 101 (2007) 137-45.
- [14] D. Li, M.A. Hallett, W. Zhu, M. Rubart, Y. Liu, Z. Yang, et. al., Dishevelled-associated activator of morphogenesis 1 (Daam1) is required for heart morphogenesis. *Development* 138 (2011) 303-15.
- [15] L.M. Iyer, S. Nagarajan, M. Woelfer, E. Schoger, S. Khadjeh, M.P. Zafiriou, et. al., A context-specific cardiac beta-catenin and GATA4 interaction influences TCF7L2 occupancy and remodels chromatin driving disease progression in the adult heart. *Nucleic Acids Res* 46 (2018) 2850-2867.
- [16] J. Qu, J. Zhou, X.P. Yi, B. Dong, H. Zheng, L.M. Miller, et. al., Cardiac-specific haploinsufficiency of beta-catenin attenuates cardiac hypertrophy but enhances fetal gene expression in response to aortic constriction. *J Mol Cell Cardiol* 43 (2007) 319-26.
- [17] M.I. Oerlemans, M.J. Goumans, B. van Middelaar, H. Clevers, P.A. Doevendans, and J.P. Sluiter, Active Wnt signaling in response to cardiac injury. *Basic Res Cardiol* 105 (2010) 631-41.

- 1 [18] L. Barandon, T. Couffinal, J. Ezan, P. Dufourcq, P. Costet, P. Alzieu, et. al., Reduction of  
2 infarct size and prevention of cardiac rupture in transgenic mice overexpressing FrzA.  
3 *Circulation* 108 (2003) 2282-9.
- 4 [19] S. Zuo, W.K. Jones, H. Li, Z. He, Z. Pasha, Y. Yang, et. al., Paracrine effect of Wnt11-  
5 overexpressing mesenchymal stem cells on ischemic injury. *Stem Cells Dev* 21 (2012)  
6 598-608.
- 7 [20] T. Urashima, M. Zhao, R. Wagner, G. Fajardo, S. Farahani, T. Quertermous, et. al.,  
8 Molecular and physiological characterization of RV remodeling in a murine model of  
9 pulmonary stenosis. *Am J Physiol Heart Circ Physiol* 295 (2008) H1351-H1368.
- 10 [21] S. Reddy, M. Zhao, D.Q. Hu, G. Fajardo, E. Katznelson, R. Punn, et. al., Physiologic and  
11 molecular characterization of a murine model of right ventricular volume overload. *Am J*  
12 *Physiol Heart Circ Physiol* 304 (2013) H1314-27.
- 13 [22] A. Abraitte, I.G. Lunde, E.T. Askevold, A.E. Michelsen, G. Christensen, P. Aukrust, et. al.,  
14 Wnt5a is associated with right ventricular dysfunction and adverse outcome in dilated  
15 cardiomyopathy. *Sci Rep* 7 (2017) 3490.
- 16 [23] J.L. Williams, O. Cavus, E.C. Loccoh, S. Adelman, J.C. Daugherty, S.A. Smith, et. al.,  
17 Defining the molecular signatures of human right heart failure. *Life Sci* 196 (2018) 118-  
18 126.
- 19 [24] A. Gaertner, P. Schwientek, P. Ellinghaus, H. Summer, S. Golz, A. Kassner, et. al.,  
20 Myocardial transcriptome analysis of human arrhythmogenic right ventricular  
21 cardiomyopathy. *Physiol Genomics* 44 (2012) 99-109.
- 22 [25] R.L. Kormos, J.J. Teuteberg, F.D. Pagani, S.D. Russell, R. John, L.W. Miller, et. al., Right  
23 ventricular failure in patients with the HeartMate II continuous-flow left ventricular assist  
24 device: incidence, risk factors, and effect on outcomes. *J Thorac Cardiovasc Surg* 139  
25 (2010) 1316-24.
- 26 [26] E.W. Grandin, P. Zamani, J.A. Mazurek, G.S. Troutman, E.Y. Birati, E. Vorovich, et. al.,  
27 Right ventricular response to pulsatile load is associated with early right heart failure and  
28 mortality after left ventricular assist device. *J Heart Lung Transplant* 36 (2017) 97-105.
- 29 [27] M. Nomi, I. Oishi, S. Kani, H. Suzuki, T. Matsuda, A. Yoda, et. al., Loss of mRor1 enhances  
30 the heart and skeletal abnormalities in mRor2-deficient mice: redundant and pleiotropic  
31 functions of mRor1 and mRor2 receptor tyrosine kinases. *Mol Cell Biol* 21 (2001) 8329-  
32 35.
- 33 [28] K. Morioka, C. Tanikawa, K. Ochi, Y. Daigo, T. Katagiri, H. Kawano, et. al., Orphan receptor  
34 tyrosine kinase ROR2 as a potential therapeutic target for osteosarcoma. *Cancer Sci*  
35 100 (2009) 1227-33.
- 36 [29] M.P. O'Connell, J.L. Fiori, K.M. Baugher, F.E. Indig, A.D. French, T.C. Camilli, et. al.,  
37 Wnt5A activates the calpain-mediated cleavage of filamin A. *J Invest Dermatol* 129  
38 (2009) 1782-9.
- 39 [30] C.Y. Chen, M.A. Caporizzo, K. Bedi, A. Vite, A.I. Bogush, P. Robison, et. al., Suppression  
40 of deetyrosinated microtubules improves cardiomyocyte function in human heart failure.  
41 *Nat Med* 24 (2018) 1225-1233.
- 42 [31] K. InanlooRahatloo, G. Liang, D. Vo, A. Ebert, I. Nguyen, and P.K. Nguyen, Sex-based  
43 differences in myocardial gene expression in recently deceased organ donors with no  
44 prior cardiovascular disease. *PLoS One* 12 (2017) e0183874.
- 45 [32] A.C. Houweling, M.M. van Borren, A.F. Moorman, and V.M. Christoffels, Expression and  
46 regulation of the atrial natriuretic factor encoding gene *Nppa* during development and  
47 disease. *Cardiovasc Res* 67 (2005) 583-93.
- 48 [33] H.S. Chen, K.S. Kolahi, and M.R. Mofrad, Phosphorylation facilitates the integrin binding of  
49 filamin under force. *Biophys J* 97 (2009) 3095-104.
- 50 [34] M. Chen, and A. Stracher, In situ phosphorylation of platelet actin-binding protein by cAMP-  
51 dependent protein kinase stabilizes it against proteolysis by calpain. *J Biol Chem* 264  
52 (1989) 14282-9.

- 1 [35] K.Y. Goh, N.W. Ng, T. Hagen, and T. Inoue, p21-activated kinase interacts with Wnt  
2 signaling to regulate tissue polarity and gene expression. *Proc Natl Acad Sci U S A* 109  
3 (2012) 15853-8.
- 4 [36] S. Stricker, V. Rauschenberger, and A. Schambony, ROR-Family Receptor Tyrosine  
5 Kinases. *Curr Top Dev Biol* 123 (2017) 105-142.
- 6 [37] S. Takeuchi, K. Takeda, I. Oishi, M. Nomi, M. Ikeya, K. Itoh, et. al., Mouse Ror2 receptor  
7 tyrosine kinase is required for the heart development and limb formation. *Genes Cells* 5  
8 (2000) 71-8.
- 9 [38] T.M. Wright, and W.K. Rathmell, Identification of Ror2 as a hypoxia-inducible factor target  
10 in von Hippel-Lindau-associated renal cell carcinoma. *J Biol Chem* 285 (2010) 12916-24.
- 11 [39] C.M. Yang, S. Ji, Y. Li, L.Y. Fu, T. Jiang, and F.D. Meng, Ror2, a Developmentally  
12 Regulated Kinase, Is Associated With Tumor Growth, Apoptosis, Migration, and Invasion  
13 in Renal Cell Carcinoma. *Oncol Res* 25 (2017) 195-205.
- 14 [40] M. Hagenmueller, J.H. Riffel, E. Bernhold, J. Fan, H.A. Katus, and S.E. Hardt, Dapper-1 is  
15 essential for Wnt5a induced cardiomyocyte hypertrophy by regulating the Wnt/PCP  
16 pathway. *FEBS Lett* 588 (2014) 2230-7.
- 17 [41] P. Zhang, C. Hu, Y. Li, Y. Wang, L. Gao, K. Lu, et. al., Vangl2 is essential for myocardial  
18 remodeling activated by Wnt/JNK signaling. *Exp Cell Res* 365 (2018) 33-45.
- 19 [42] J. Yue, S. Huhn, and Z. Shen, Complex roles of filamin-A mediated cytoskeleton network in  
20 cancer progression. *Cell Biosci* 3 (2013) 7.
- 21 [43] Y. Feng, M.H. Chen, I.P. Moskowitz, A.M. Mendonza, L. Vidali, F. Nakamura, et. al.,  
22 Filamin A (FLNA) is required for cell-cell contact in vascular development and cardiac  
23 morphogenesis. *Proc Natl Acad Sci U S A* 103 (2006) 19836-41.
- 24 [44] M. Zenker, L. Nahrlich, H. Sticht, A. Reis, and D. Horn, Genotype-epigenotype-phenotype  
25 correlations in females with frontometaphyseal dysplasia. *Am J Med Genet A* 140 (2006)  
26 1069-73.
- 27 [45] A. Nomachi, M. Nishita, D. Inaba, M. Enomoto, M. Hamasaki, and Y. Minami, Receptor  
28 tyrosine kinase Ror2 mediates Wnt5a-induced polarized cell migration by activating c-  
29 Jun N-terminal kinase via actin-binding protein filamin A. *J Biol Chem* 283 (2008) 27973-  
30 81.
- 31 [46] H.A. Ahmad, L. Lu, S. Ye, G.G. Schwartz, and C.R. Greyson, Calpain inhibition preserves  
32 talin and attenuates right heart failure in acute pulmonary hypertension. *Am J Respir Cell*  
33 *Mol Biol* 47 (2012) 379-86.
- 34 [47] J. Nopparat, J. Zhang, J.P. Lu, Y.H. Chen, D. Zheng, P.D. Neuffer, et. al., a Wnt/beta-  
35 catenin modulator, reveals inducible mutagenesis promoting cancer cell survival  
36 adaptation and metabolic reprogramming. *Oncogene* 34 (2015) 1542-52.
- 37 [48] A.R. Hemnes, E.L. Brittain, A.W. Trammell, J.P. Fessel, E.D. Austin, N. Penner, et. al.,  
38 Evidence for right ventricular lipotoxicity in heritable pulmonary arterial hypertension. *Am*  
39 *J Respir Crit Care Med* 189 (2014) 325-34.
- 40 [49] S. Mazzotta, C. Neves, R.J. Bonner, A.S. Bernardo, K. Docherty, and S. Hoppler,  
41 Distinctive Roles of Canonical and Noncanonical Wnt Signaling in Human Embryonic  
42 Cardiomyocyte Development. *Stem Cell Reports* 7 (2016) 764-776.
- 43 [50] H. Laeremans, T.M. Hackeng, M.A. van Zandvoort, V.L. Thijssen, B.J. Janssen, H.C.  
44 Ottenheijm, et. al., Blocking of frizzled signaling with a homologous peptide fragment of  
45 wnt3a/wnt5a reduces infarct expansion and prevents the development of heart failure  
46 after myocardial infarction. *Circulation* 124 (2011) 1626-35.
- 47 [51] M.A. Burke, S. Chang, H. Wakimoto, J.M. Gorham, D.A. Conner, D.C. Christodoulou, et.al.,  
48 Molecular profiling of dilated cardiomyopathy that progresses to heart failure. *JCI Insight*  
49 1 (2016).
- 50 [52] H. Wang, Y. Lee, and C.C. Malbon, PDE6 is an effector for the Wnt/Ca<sup>2+</sup>/cGMP-signalling  
51 pathway in development. *Biochem Soc Trans* 32 (2004) 792-6.
- 52 [53] J. Gomez-Arroyo, S. Mizuno, K. Szczepanek, B. Van Tassell, R. Natarajan, C.G. dos  
53 Remedios, et. al., Metabolic gene remodeling and mitochondrial dysfunction in failing



1 right ventricular hypertrophy secondary to pulmonary arterial hypertension. *Circ Heart*  
2 *Fail* 6 (2013) 136-44.

3 [54] S. Sprowl-Tanio, A.N. Habowski, K.T. Pate, M.M. McQuade, K. Wang, R.A. Edwards, et.  
4 al., Lactate/pyruvate transporter MCT-1 is a direct Wnt target that confers sensitivity to  
5 3-bromopyruvate in colon cancer. *Cancer Metab* 4 (2016) 20.

6 [55] Nagy, II, A. Railo, R. Rapila, T. Hast, R. Sormunen, P. Tavi, et. al., Wnt-11 signalling  
7 controls ventricular myocardium development by patterning N-cadherin and beta-catenin  
8 expression. *Cardiovasc Res* 85 (2010) 100-9.

9  
10

## Figures and Tables

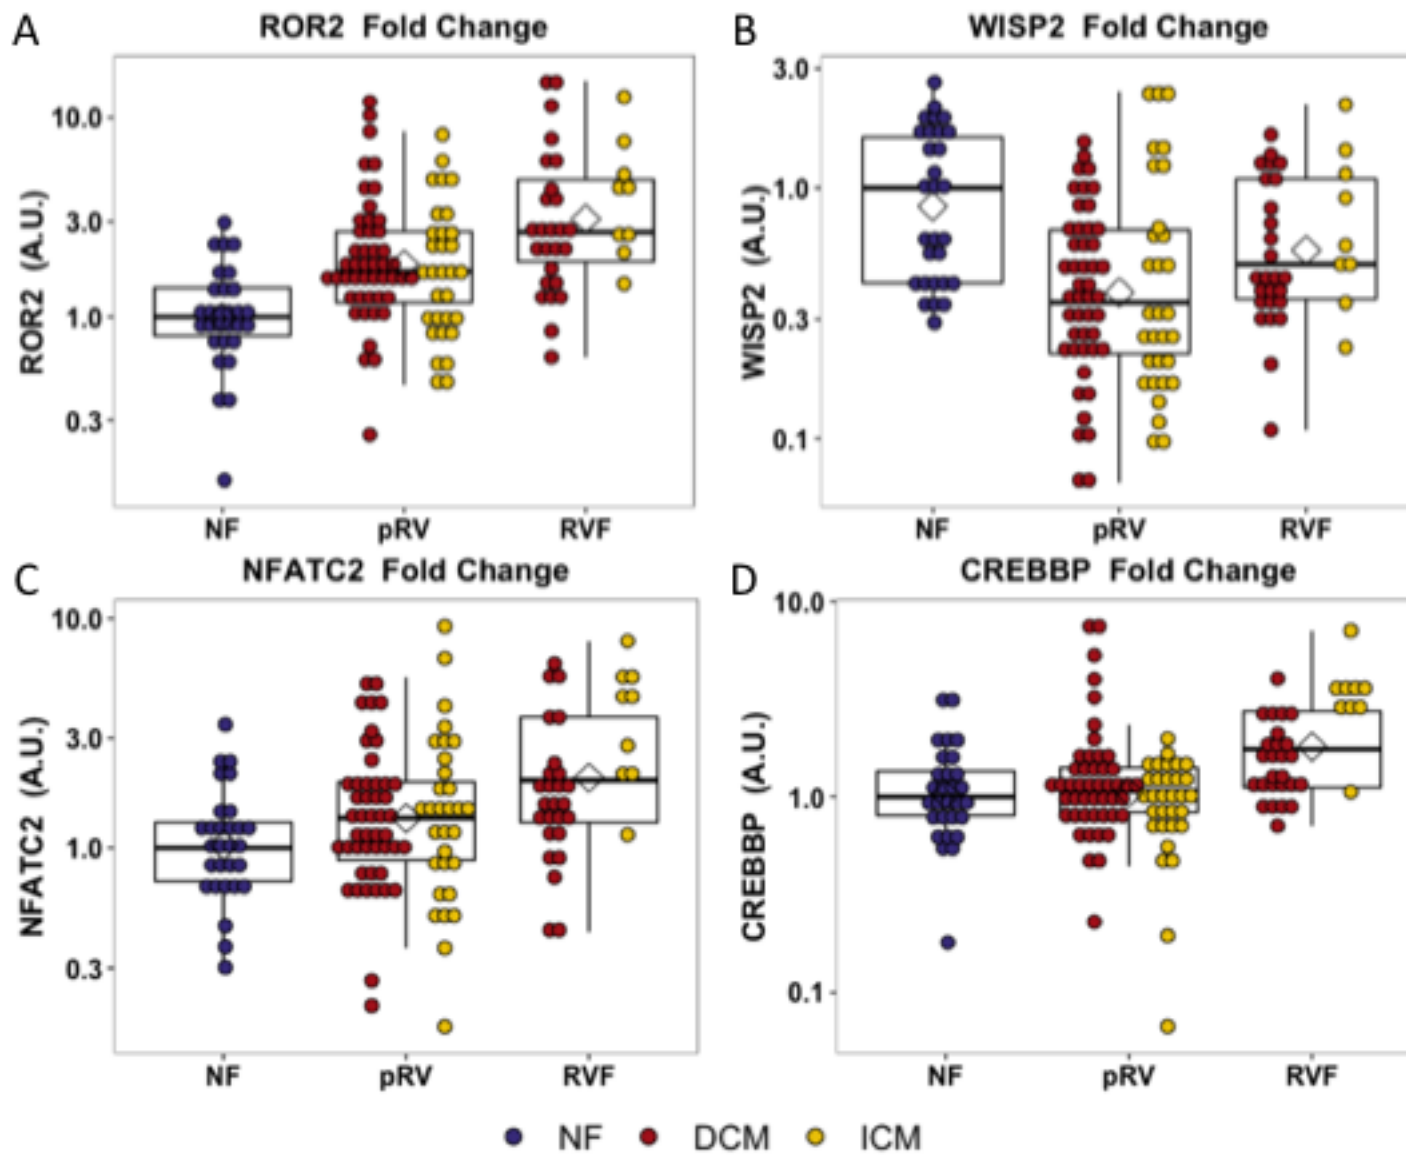

1 **Figure 1** Relative RNA expression of WNT-related genes with differential transcription between pRV and RVF as noted in panels A-D.

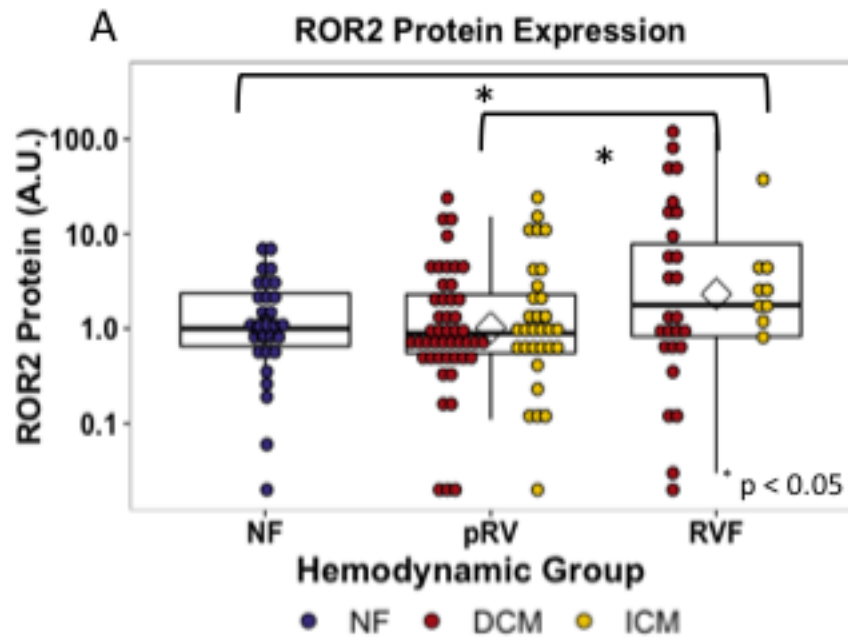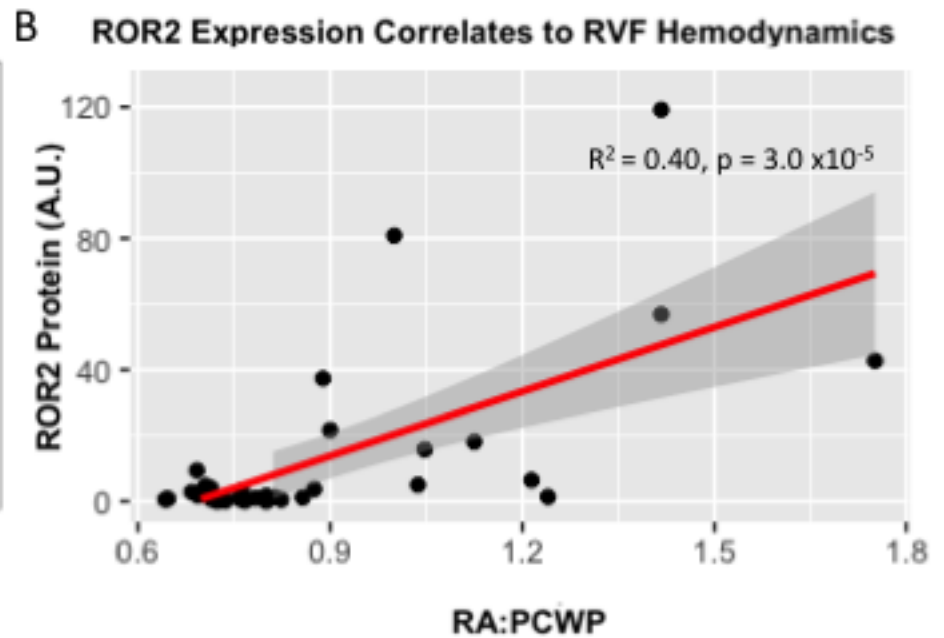

1  
 2 **Figure 2** ROR2 protein expression increases in RVF and correlates with hemodynamics  
 3 (A) Dot plot demonstrating ROR2 protein expression among different groups and (B) linear regression comparing ROR2 protein expression  
 4 to RA:PCWP.

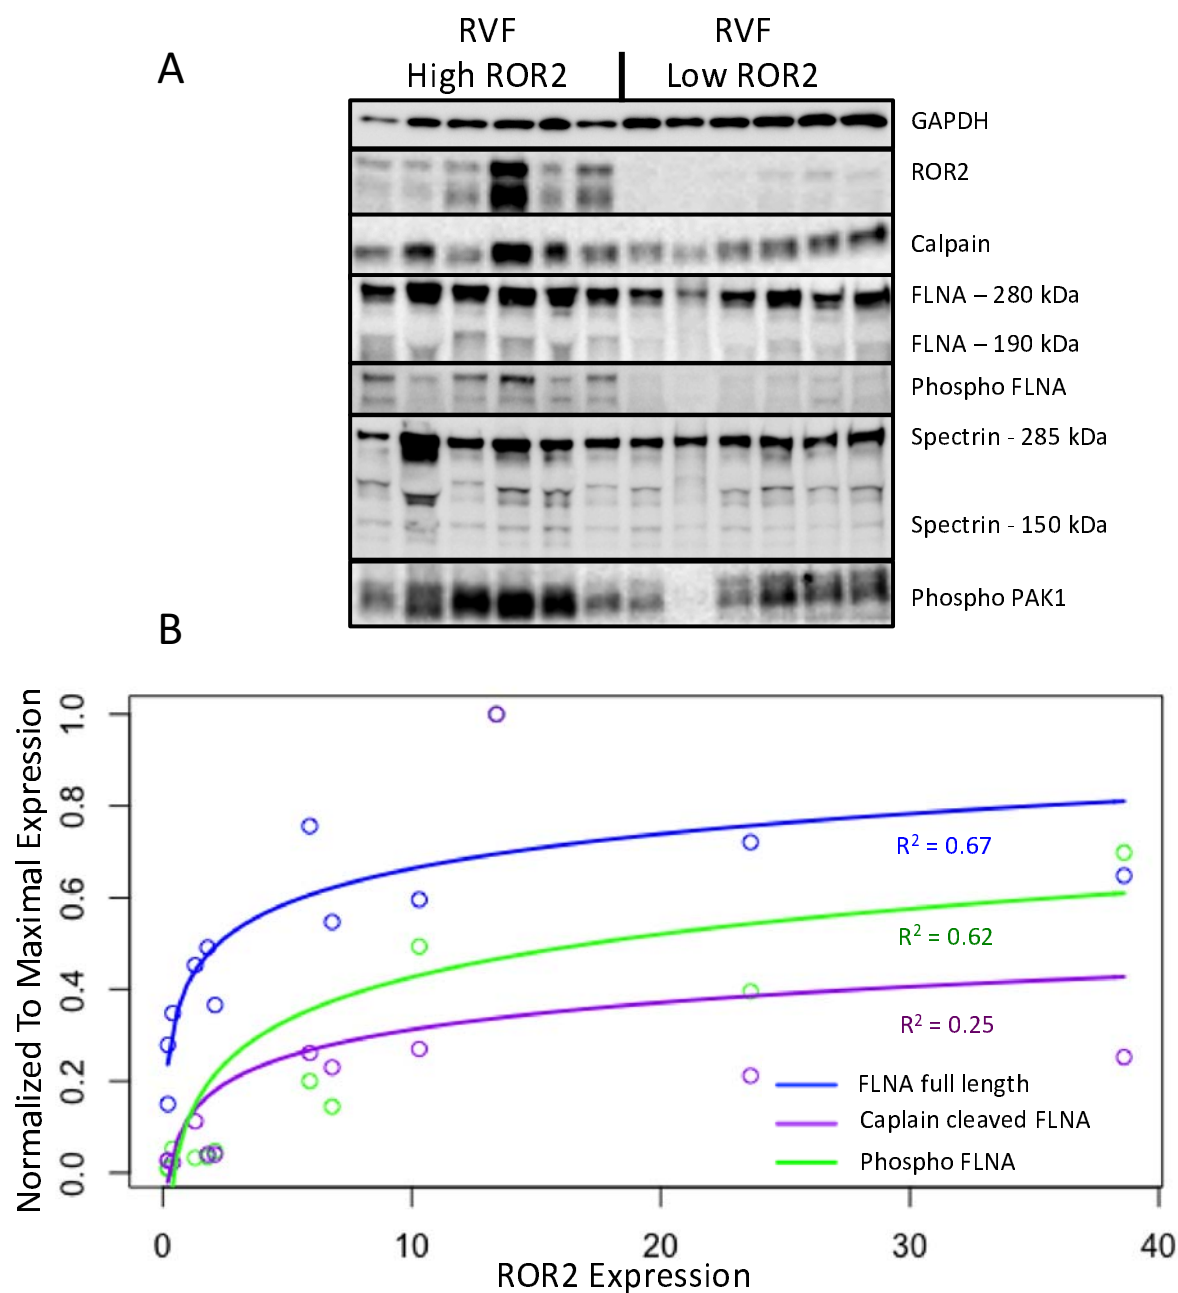

1  
2 **Figure 3** ROR2 expression correlates with increases in calpain expression and calpain-  
3 mediated cleavage  
4 (A) Western blots comparing expression of downstream targets between high and low ROR2  
5 expressing RVF patients. (B) Logarithmic regressions comparing ROR2 expression to full  
6 length, calpain cleaved, and phosphorylated FLNA



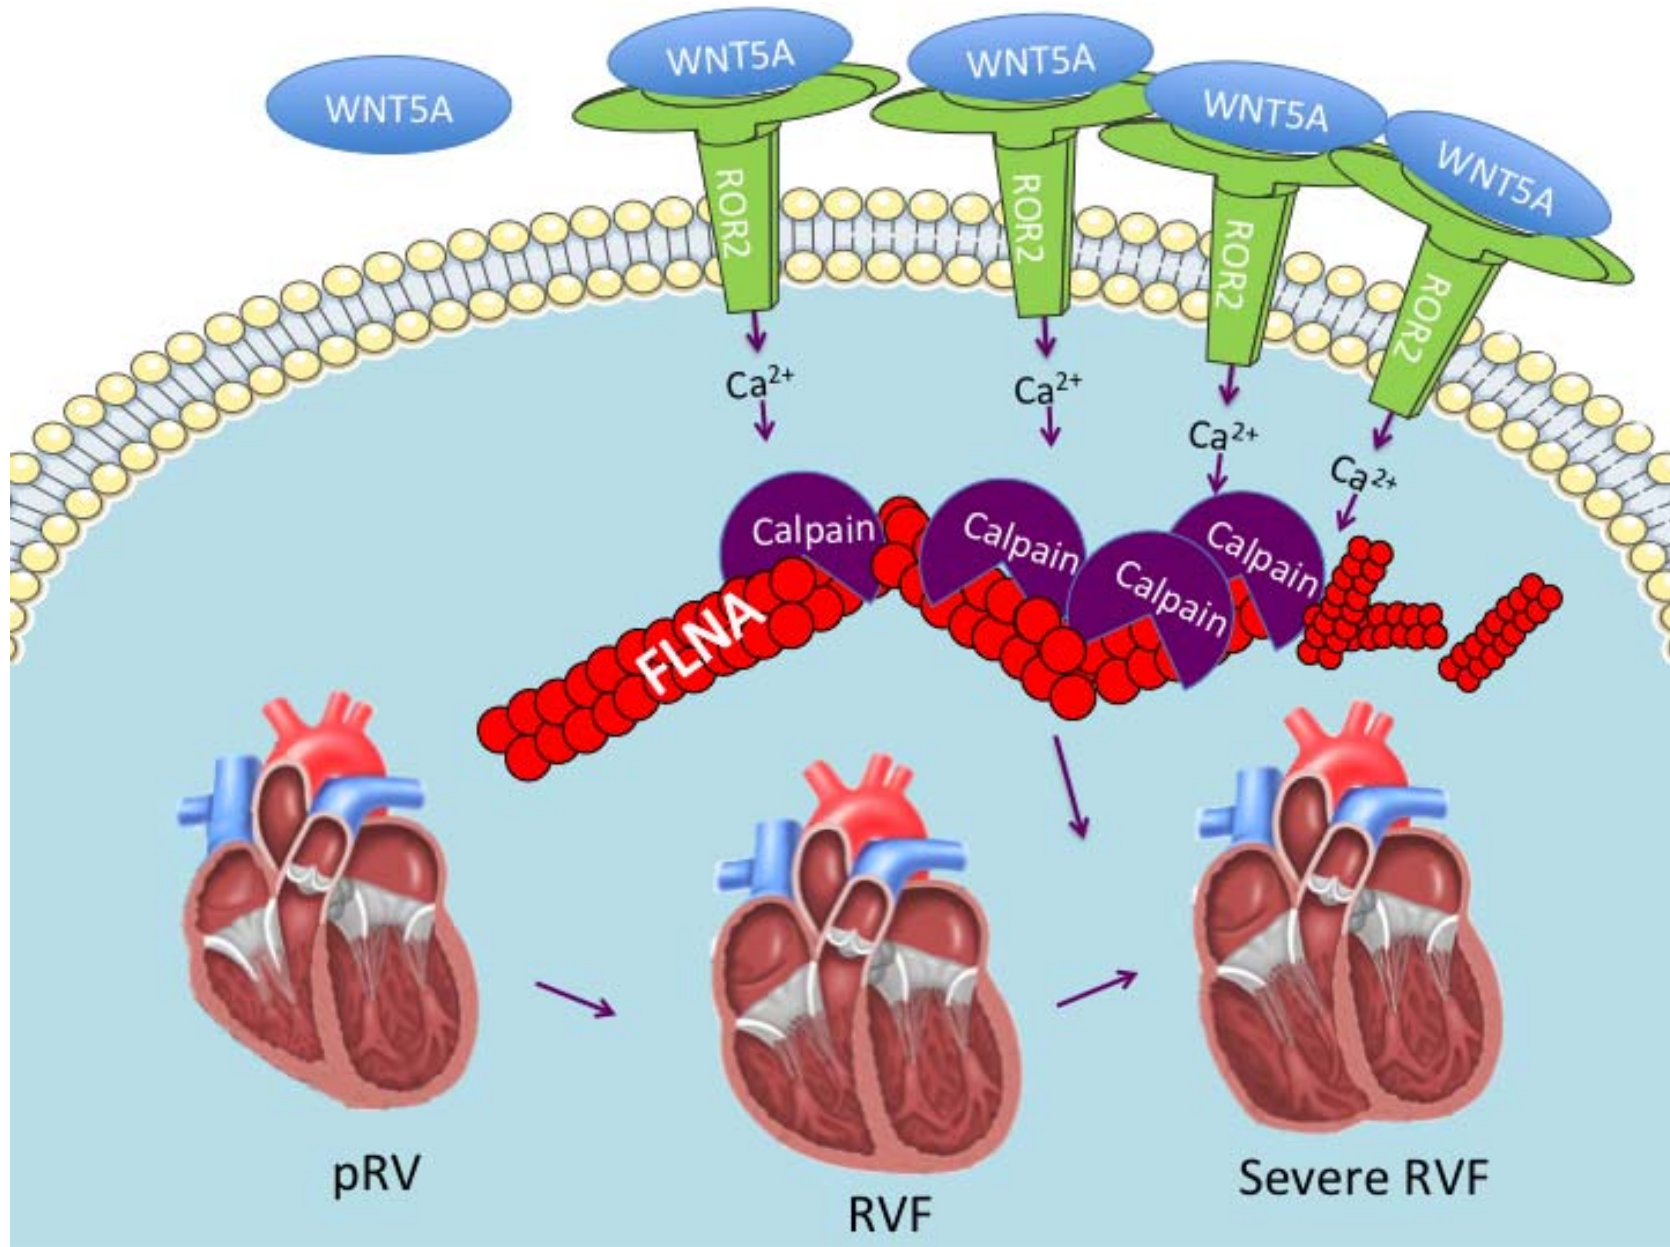

1  
2

1 **Figure 4**  
2 Proposed RVF model consisting of reactivation of a ROR2 fetal gene program with increasing RVF severity, which results in increased  
3 calpain expression and activity leading to calpain-mediated cleavage of cytoskeleton structural proteins including FLNA.  
4

1 **Table 1** Clinical and demographic characteristics of right ventricular functional status by  
 2 cardiomyopathy type.  
 3 <sup>a</sup>Continuous variables presented as median (interquartile range) and *p* value using two-tailed

| Clinical and demographic characteristics         |                        |                    |       |                         |                    |       |
|--------------------------------------------------|------------------------|--------------------|-------|-------------------------|--------------------|-------|
| Variables                                        | Dilated Cardiomyopathy |                    |       | Ischemic Cardiomyopathy |                    |       |
|                                                  | RVF<br>n = 26          | pRV<br>n = 47      | Adj p | RVF<br>n = 9            | pRV<br>n = 31      | Adj p |
| Age <sup>a</sup>                                 | 56.5<br>(49, 58)       | 52.0<br>(44, 60)   | 0.60  | 60.0<br>(56, 62)        | 61.0<br>(55, 63)   | 1.0   |
| Male                                             | 50%                    | 72%                | 0.60  | 89%                     | 87%                | 1.0   |
| Ethnicity                                        |                        |                    | 1.0   |                         |                    | 1.0   |
| Caucasian                                        | 54%                    | 64%                |       | 89%                     | 84%                |       |
| African American                                 | 38%                    | 30%                |       | 0%                      | 13%                |       |
| Other                                            | 8%                     | 6%                 |       | 11%                     | 3%                 |       |
| Heart weight (grams) <sup>a</sup>                | 471<br>(380, 549)      | 465<br>(421, 545)  | 0.87  | 570<br>(512, 625)       | 552<br>(455, 639)  | 1.0   |
| Weight (kg) <sup>a</sup>                         | 76<br>(73, 91)         | 80<br>(69, 92)     | 1.0   | 93<br>(84, 113)         | 82<br>(75, 94)     | 0.92  |
| Body surface area (m <sup>2</sup> ) <sup>a</sup> | 1.90<br>(1.8, 2.1)     | 1.95<br>(1.8, 2.1) | 1.0   | 2.19<br>(2.0, 2.4)      | 1.99<br>(1.9, 2.2) | 0.92  |
| GFR <sup>#</sup>                                 | 49.0<br>(43, 65)       | 67.3<br>(55, 82)   | 0.10  | 55.4<br>(42, 56)        | 53.5<br>(44, 70)   | 1.0   |
| Diabetes Mellitus                                | 32%                    | 28%                | 1.0   | 56%                     | 39%                | 1.0   |
| Insulin                                          | 15%                    | 15%                | 1.0   | 44%                     | 13%                | 1.0   |
| Thyroid medication                               | 31%                    | 6%                 | 0.14  | 33%                     | 16%                | 1.0   |
| Pacer                                            | 38%                    | 21%                | 0.60  | 11%                     | 6%                 | 1.0   |
| ACE inhibitor                                    | 54%                    | 51%                | 1.0   | 56%                     | 58%                | 1.0   |
| ARB                                              | 31%                    | 26%                | 1.0   | 22%                     | 16%                | 1.0   |
| β-blocker                                        | 81%                    | 94%                | 0.60  | 67%                     | 87%                | 1.0   |
| Any Reverse Remodeling                           | 100%                   | 96%                | 1.0   | 100%                    | 94%                | 1.0   |
| Calcium Channel Blocker                          | 8%                     | 6%                 | 1.0   | 0%                      | 0%                 | 1.0   |
| Digoxin                                          | 50%                    | 47%                | 1.0   | 22%                     | 45%                | 1.0   |
| Diuretic                                         | 100%                   | 87%                | 0.60  | 78%                     | 90%                | 1.0   |
| Lipid lowering                                   | 42%                    | 49%                | 1.0   | 67%                     | 71%                | 1.0   |
| Milrinone                                        | 65%                    | 72%                | 1.0   | 86%                     | 71%                | 1.0   |
| RCA disease                                      | 4%                     | 0%                 | N/A   | 56%                     | 74%                | 1.0   |
| Prior CABG                                       | 0%                     | 0%                 | N/A   | 67%                     | 43%                | 1.0   |
| Prior Angioplasty                                | 4%                     | 0%                 | N/A   | 56%                     | 52%                | 1.0   |
| Prior Stent                                      | 4%                     | 0%                 | N/A   | 56%                     | 52%                | 1.0   |

4 Mann-Whitney U test. Categorical variables presented as percent and *p* value using Chi square  
 5 2x2 contingency tables using pairwise deletion for any missing data. All *p* values are Benjamini-  
 6 Hochberg corrected, and none were less than 0.05. Abbreviations: angiotensin converting  
 7 enzyme inhibitor (ACE inhibitor), angiotensin receptor blocker (ARB), coronary artery bypass  
 8 grafting (CABG), glomerular filtration rate (GFR), and RCA (right coronary artery disease).  
 9

1 **Table 2**

| Differential RNA Expression between RVF and pRV |                         |                             |
|-------------------------------------------------|-------------------------|-----------------------------|
| Gene                                            | RVF/pRV Fold Expression | Adj p                       |
| AXIN2                                           | 1.30                    | 0.07                        |
| <b>CREBBP</b>                                   | <b>1.64</b>             | <b>2.63x10<sup>-4</sup></b> |
| DAAM2                                           | 1.15                    | 0.46                        |
| FZD1                                            | 1.10                    | 0.55                        |
| FZD7                                            | 1.19                    | 0.46                        |
| <b>NFATC2</b>                                   | <b>1.46</b>             | <b>0.033</b>                |
| <b>NPPA</b>                                     | <b>2.68</b>             | <b>0.037</b>                |
| <b>ROR2</b>                                     | <b>1.57</b>             | <b>0.010</b>                |
| SFRP1                                           | 0.90                    | 0.31                        |
| SFRP3                                           | 1.23                    | 0.13                        |
| <b>WISP2</b>                                    | <b>1.42</b>             | <b>0.039</b>                |
| WNT10B                                          | 1.03                    | 0.55                        |

- 2 Genes which were differentially expressed in DCM and ICM pRV/RVF compared to NF using  
3 Kruskal Wallis were selected for further analysis comparing RVF to pRV expression using  
4 Benjamini Hochberg corrected Mann Whitney U test (p <0.05, bolded for significance).

1 **Table 3** Comparative analysis of human RVF with high and low ROR2 expression

2

| Increased ROR2 Expression Correlates with Calpain-Mediated Cleavage in Right Ventricular Failure |                                        |                         |                             |                             |               |
|--------------------------------------------------------------------------------------------------|----------------------------------------|-------------------------|-----------------------------|-----------------------------|---------------|
| Target                                                                                           | ROR2 Expression as Continuous Variable |                         |                             | High vs Low ROR2 Expression |               |
|                                                                                                  | Relationship                           | Adjusted R <sup>2</sup> | Adj P                       | Median Fold                 | Adj P         |
| Spectrin 285 kDa                                                                                 | Logarithmic                            | 0.17                    | 0.10                        | 1.4                         | 0.0080        |
| Spectrin 150 kDa                                                                                 | Logarithmic                            | 0.17                    | 0.10                        | 2.7                         | 0.015         |
| <b>FLNA 280 kDa</b>                                                                              | <b>Logarithmic</b>                     | <b>0.67</b>             | <b>0.0018</b>               | <b>1.9</b>                  | <b>0.0080</b> |
| FLNA 190 kDa                                                                                     | Logarithmic                            | 0.25                    | 0.077                       | 7.6                         | 0.0080        |
| <b>Phospho:Total FLNA</b>                                                                        | <b>Logarithmic</b>                     | <b>0.62</b>             | <b>0.0025</b>               | <b>9.7</b>                  | <b>0.0080</b> |
| <b>Phosphorylated PAK1</b>                                                                       | <b>Logarithmic</b>                     | <b>0.83</b>             | <b>1.4 x10<sup>-4</sup></b> | <b>2.1</b>                  | <b>0.011</b>  |
| <b>Calpain</b>                                                                                   | <b>Linear</b>                          | <b>0.66</b>             | <b>0.0018</b>               | <b>1.8</b>                  | <b>0.015</b>  |

3

4 Comparative analysis of high (n = 6) vs low (n = 6) ROR2 expressing RVF samples using ROR2 expression categorically (high vs  
 5 low) or as a continuous variable. As a continuous variable, target expression was assessed using both logarithmic and linear models  
 6 and the most significant model for each is displayed. In bold are comparisons that were statistically significant in both analyses.



## SUPPLEMENTAL MATERIAL

- 1
- 2
- 3 **Supplemental Table 1** – RT-PCR primer sequences
- 4 **Supplemental Table 2** – Clinical and demographic variables of combined pRV and RVF groups
- 5 **Supplemental Table 3**– Demographic variables of NF, pRV, and RVF groups for DCM and ICM
- 6 separately
- 7 **Supplemental Table 4** – Fold changes by RT-PCR of WNT-related genes in DCM-pRV, DCM-
- 8 RVF, ICM-pRV, and ICM-RVF
- 9 **Supplemental Figure 1** – Preliminary western blot analysis of candidate genes with differential
- 10 transcription between pRV and RVF
- 11

1 **Supplemental Table 1**

2 RT-PCR primer sequences for tested genes with references to known role in WNT signaling  
3 and/or cardiac pathology.  
4

| Gene Symbol | Forward                      | Reverse                      | Amplicon Size (bp) | Ref  |
|-------------|------------------------------|------------------------------|--------------------|------|
| AXIN2       | TGTCCAGCAAACCTCTGAGG         | GTGCAAAGACATAGCCAGAAC        | 129                | [21] |
| CAPNS1      | CACCCTGATCTGAAGACTGATG       | CCTGCCACCTTTTGATGTTG         | 136                | [29] |
| CREBBP      | GCCGTTTACCATGAGATCCTTA       | GGGTGGCAATGGAAGATGTA         | 122                | [21] |
| CTNND2      | CGGCATCTCCAAAAGCAAAG         | AAGACGAGGCTACAAAGTGG         | 149                | [47] |
| DAAM1       | TCACCCAGAAATCACGTATCG        | TCTGTGTTTGTCTGTGAGGTC        | 148                | [48] |
| DAAM2       | AGATGTTTTCAGCCTACCAGAG       | ATGACCGACAGCTCTTTGAC         | 94                 | [21] |
| DKK3        | AGGACACGCAGCACAAATTG         | CCAGTCTGGTTGTTGGTTATCTT      | 196                | [49] |
| FZD1        | CATCGTCATCGCCTGCTACT         | TAGCGTAGCTCTTGCAGCTC         | 89                 | [50] |
| FZD2        | GGTGTCCGGTGGCCTACAT          | GAGAAGCGCTCGTTGCAC           | 66                 | [21] |
| FZD5        | GCACAACCACATCCACTACG         | GCCATGCCGAAGAAGTAGAC         | 81                 | [21] |
| FZD6        | TTATGACCAGAGTATTGCCGC        | AGTTTACGACAAGGTGGAACC        | 150                | [21] |
| FZD7        | CGCCTCTGTTCTGTCTACCTC        | TCATGATGGTGC GGATACGG        | 84                 | [51] |
| GAPDH       | GGAAGGTGAAGGTCGGAGTC         | GTTGAGGTCAATGAAGGGGTC        | 119                |      |
| GSK3B       | CAAACAGACGCTCCCTGTG          | TTCAAAGGAATGGATATAGGC<br>T   | 83                 | [21] |
| JNK1        | CCAGGACTGCAGGAACGAGT         | CCACGTTTTCTTGTAGCCC          | 102                | [40] |
| NFATC2      | GAGGGGCTGTCAAAGCTCC          | ACAGTTTTCCCGTGATTCCGG        | 163                | [22] |
| NPPA        | AGGATGGACAGGATTGGAGC         | AAGTGTGACAGGAAGCTGC          | 206                |      |
| NPPB        | GCTGCTTTGGGAGGAAGATG         | ATGAGTCACTTCAAAGGCCGG        | 159                |      |
| PDE6B       | AATAGGAAAGAGTGGAAGGCG        | AGCAGGTTGAAGACTTGGG          | 148                | [52] |
| PDK1        | CTATGAAAATGCTAGGCGTCTGT      | TGGGATGGTACATAAACCCTT<br>G   | 120                | [53] |
| ROCK2       | TGATGGTTTCTATGGGCGAG         | TGTTCTACAAGTGAATCCGC         | 106                | [21] |
| ROR2        | AGAATATGGTTCACGACTGCG        | GTTATGATTTGGGCTGTGCG         | 148                | [37] |
| SFRP1       | AAGTGTGACAAGTTCCCCG          | TGGCCTCAGATTTCAACTCG         | 127                | [18] |
| SFRP2       | ATGATGATGACAACGACATAATG      | ATGCGCTTGAAGCTCTCTGTC        | 322                | [21] |
| SFRP3       | GGGACACTGTCAACCTCTATAC<br>CA | GAGCCTTCCACCAAGAGTAATC<br>TG | 124                | [22] |
| SLC16A1     | CACCAGCGAAGTGTCATGGA         | TCAAGTTGAAGGCAAGCCCA         | 224                | [54] |
| WISP2       | CATAAAGACTCACAGGTCCGC        | GGCAGGTACATGGTGTGCG          | 150                | [51] |
| WNT1        | CGGCGTTTATCTTCGCTATC         | TTCGATGGAACCTTCTGAGC         | 77                 | [21] |
| WNT10B      | GATACCCACAACCGCAATTC         | GGGTCTCGCTCACAGAAGTC         | 110                | [49] |
| WNT11       | GGCCAAGTTTTCCGATGCTC         | CACCCCATGGCACTTACT           | 139                | [55] |
| WNT5A       | GCCCAGGTTGTAATTGAAGC         | TGGCACAGTTTCTTCTGTCC         | 143                | [22] |

5

1 **Supplemental Table 2**

2 Clinical and demographic characteristics of combined DCM and ICM hemodynamic groups.

3

| Clinical and Demographic Characteristics <span style="float: right;">4</span> |                    |                    |       |
|-------------------------------------------------------------------------------|--------------------|--------------------|-------|
| Variables                                                                     | RVF<br>n = 35      | pRV<br>n = 78      | Adj p |
| DCM                                                                           | 74%                | 60%                | 0.77  |
| Age <sup>a</sup>                                                              | 57<br>(52, 61)     | 55.5<br>(49, 62)   | 0.92  |
| Male                                                                          | 60%                | 78%                | 0.37  |
| Ethnicity                                                                     |                    |                    | 0.88  |
| Caucasian                                                                     | 63%                | 72%                |       |
| African American                                                              | 29%                | 23%                |       |
| Other                                                                         | 9%                 | 5%                 |       |
| Heart weight (grams) <sup>a</sup>                                             | 499<br>(388, 570)  | 498<br>(429, 609)  | 0.87  |
| Weight (kg) <sup>a</sup>                                                      | 84<br>(73, 97)     | 81<br>(70, 93)     | 0.88  |
| Body surface area (m <sup>2</sup> ) <sup>a</sup>                              | 1.96<br>(1.9, 2.2) | 1.97<br>(1.8, 2.2) | 0.88  |
| GFR <sup>#</sup>                                                              | 50.1<br>(40, 62)   | 62.2<br>(49, 81)   | 0.16  |
| Diabetes Mellitus                                                             | 38%                | 32%                | 0.89  |
| Insulin                                                                       | 23%                | 16%                | 0.88  |
| Thyroid medication                                                            | 31%                | 10%                | 0.16  |
| Pacer                                                                         | 31%                | 15%                | 0.37  |
| ACE inhibitor                                                                 | 54%                | 55%                | 1.0   |
| ARB                                                                           | 29%                | 22%                | 0.88  |
| β-blocker                                                                     | 77%                | 92%                | 0.36  |
| Any Remodeling                                                                | 100%               | 96%                | 0.88  |
| Calcium Channel Blocker                                                       | 6%                 | 4%                 | 1.0   |
| Digoxin                                                                       | 43%                | 46%                | 1.0   |
| Diuretic                                                                      | 94%                | 90%                | 0.89  |
| Lipid lowering                                                                | 49%                | 59%                | 0.88  |
| Milrinone                                                                     | 70%                | 73%                | 1.0   |

5

6 <sup>a</sup>Continuous variables presented as median (interquartile range) and *p* value using two-tailed  
7 Mann-Whitney U test. Categorical variables presented as percent and *p* value using Chi square  
8 contingency tables using pairwise deletion for any missing data. All *p* values are Benjamini-  
9 Hochberg corrected, and none were less than 0.05. Abbreviations: angiotensin converting  
10 enzyme inhibitor (ACE inhibitor), angiotensin receptor blocker (ARB), coronary artery bypass  
11 grafting (CABG), glomerular filtration rate (GFR), and RCA (right coronary artery disease).

12

1 **Supplemental Table 3** Demographic characteristics of NF compared to RV remodeling groups.

2

| Demographic Characteristics Between Nonfailing and RV Remodeling Groups |                    |                    |                    |              |                    |                    |                              |
|-------------------------------------------------------------------------|--------------------|--------------------|--------------------|--------------|--------------------|--------------------|------------------------------|
| Variables                                                               | NF<br>n = 29       | DCM-pRV<br>n= 47   | DCM-RVF<br>n= 26   | Adj P        | ICM-pRV<br>n = 31  | ICM-RVF<br>n= 9    | Adj P                        |
| Age <sup>a</sup>                                                        | 56<br>(45, 63)     | 52<br>(44, 60)     | 56.5<br>(48, 58)   | 0.34         | 61.0<br>(55, 63)   | 60.0<br>(56, 62)   | 0.56                         |
| Male                                                                    | <b>38%</b>         | <b>72%</b>         | <b>50%</b>         | <b>0.047</b> | <b>84%</b>         | <b>89%</b>         | <b>4.6 x 10<sup>-4</sup></b> |
| Ethnicity                                                               |                    |                    |                    | 0.34         |                    |                    | 0.69                         |
| Caucasian                                                               | 79%                | 64%                | 54%                |              | 78%                | 89%                |                              |
| African American                                                        | 14%                | 30%                | 38%                |              | 13%                | 0%                 |                              |
| Other                                                                   | 7%                 | 6%                 | 8%                 |              | 3%                 | 11%                |                              |
| Weight (kg) <sup>a</sup>                                                | 69<br>(62, 87)     | 80<br>(69, 92)     | 76<br>(73, 91)     | 0.83         | 82<br>(75, 94)     | 93<br>(84, 113)    | 0.56                         |
| Body surface area (m <sup>2</sup> ) <sup>a</sup>                        | 1.82<br>(1.7, 2.0) | 1.95<br>(1.8, 2.1) | 1.90<br>(1.8, 2.1) | 0.30         | 1.99<br>(1.9, 2.2) | 2.19<br>(2.0, 2.4) | 0.41                         |

3

4 <sup>a</sup>Continuous variables presented as median (interquartile range) comparing NF/pRV/RVF separately for DCM and ICM using Kruskal-Wallis  
 5 test. Gender and ethnicity assessed using chi-square. All comparisons corrected using Benjamini-Hochberg

6

1 **Supplemental Table 4**

2 Differential WNT-related gene expression in Dilated and Ischemic Cardiomyopathy Right  
3 Ventricle

| Fold Enrichment in pRV and RVF in candidate WNT-related genes |             |             |                               |             |             |                              |
|---------------------------------------------------------------|-------------|-------------|-------------------------------|-------------|-------------|------------------------------|
|                                                               | DCM-pRV     | DCM-RVF     |                               | ICM-pRV     | ICM-RVF     |                              |
| Gene                                                          | Fold        | Fold        | Adj p                         | Fold        | Fold        | Adj p                        |
| <b>Natriuretic Peptides</b>                                   |             |             |                               |             |             |                              |
| <b>NPPA</b>                                                   | <b>16.2</b> | <b>27.9</b> | <b>9.56 x10<sup>-8</sup></b>  | <b>2.3</b>  | <b>13.1</b> | <b>0.0023</b>                |
| NPPB                                                          | 9.2         | 15.8        | 0.026                         | 1.9         | 4.4         | 0.34                         |
| <b>WNT Ligands</b>                                            |             |             |                               |             |             |                              |
| WNT1                                                          | 2.83        | 2.63        | 0.0022                        | 2.09        | 2.35        | 0.050                        |
| <b>WNT10B</b>                                                 | <b>2.95</b> | <b>2.64</b> | <b>0.0075</b>                 | <b>2.22</b> | <b>2.58</b> | <b>0.018</b>                 |
| WNT11                                                         | 1.02        | 1.19        | 0.89                          | 0.99        | 2.30        | 0.046                        |
| WNT5A                                                         | 0.84        | 0.78        | 0.15                          | 0.61        | 1.11        | 0.0025                       |
| <b>WNT receptors/co-receptors</b>                             |             |             |                               |             |             |                              |
| <b>FZD1</b>                                                   | <b>2.09</b> | <b>1.84</b> | <b>0.014</b>                  | <b>1.69</b> | <b>2.48</b> | <b>0.019</b>                 |
| FZD2                                                          | 2.02        | 2.05        | 1.37 x10 <sup>-4</sup>        | 1.21        | 1.42        | 0.083                        |
| FZD5                                                          | 0.84        | 0.90        | 0.34                          | 0.79        | 1.94        | 0.0046                       |
| FZD6                                                          | 1.16        | 1.19        | 0.32                          | 1.03        | 0.77        | 0.73                         |
| <b>FZD7</b>                                                   | <b>1.81</b> | <b>2.01</b> | <b>4.58 x10<sup>-7</sup></b>  | <b>1.85</b> | <b>2.54</b> | <b>3.31 x10<sup>-6</sup></b> |
| <b>ROR2</b>                                                   | <b>1.71</b> | <b>2.57</b> | <b>9.05 x10<sup>-6</sup></b>  | <b>1.64</b> | <b>4.32</b> | <b>6.83 x10<sup>-4</sup></b> |
| <b>WNT inhibitors</b>                                         |             |             |                               |             |             |                              |
| DKK3                                                          | 0.86        | 0.85        | 0.36                          | 0.87        | 1.18        | 0.47                         |
| <b>SFRP1</b>                                                  | <b>1.67</b> | <b>1.34</b> | <b>0.0022</b>                 | <b>2.20</b> | <b>3.01</b> | <b>0.0012</b>                |
| SFRP2                                                         | 3.04        | 4.02        | 0.021                         | 2.32        | 10.08       | 0.13                         |
| <b>SFRP3</b>                                                  | <b>4.26</b> | <b>4.37</b> | <b>1.10 x10<sup>-10</sup></b> | <b>2.76</b> | <b>3.90</b> | <b>2.79 x10<sup>-5</sup></b> |
| <b>Cytoplasmic Signaling</b>                                  |             |             |                               |             |             |                              |
| <b>AXIN2</b>                                                  | <b>0.62</b> | <b>0.63</b> | <b>0.033</b>                  | <b>0.51</b> | <b>1.18</b> | <b>0.0013</b>                |
| DAAM1                                                         | 1.11        | 1.14        | 0.62                          | 0.97        | 1.02        | 0.71                         |
| <b>DAAM2</b>                                                  | <b>0.52</b> | <b>0.39</b> | <b>0.0068</b>                 | <b>0.19</b> | <b>0.38</b> | <b>2.79 x10<sup>-5</sup></b> |
| GSK3B                                                         | 1.01        | 1.02        | 0.94                          | 0.90        | 1.16        | 0.046                        |
| <b>NFATC2</b>                                                 | <b>1.30</b> | <b>1.57</b> | <b>0.032</b>                  | <b>1.44</b> | <b>4.48</b> | <b>0.0023</b>                |
| <b>Target Genes</b>                                           |             |             |                               |             |             |                              |
| CAPNS1                                                        | 0.93        | 1.08        | 0.51                          | 0.99        | 1.60        | 0.053                        |
| <b>CREBBP</b>                                                 | <b>1.12</b> | <b>1.38</b> | <b>0.033</b>                  | <b>0.95</b> | <b>3.33</b> | <b>6.83 x10<sup>-4</sup></b> |
| CTNND2                                                        | 1.19        | 0.92        | 0.56                          | 0.72        | 2.35        | 0.56                         |
| JNK1                                                          | 1.44        | 1.35        | 0.0060                        | 1.31        | 0.99        | 0.050                        |
| PDE6B                                                         | 1.08        | 1.10        | 0.50                          | 0.88        | 1.19        | 0.15                         |
| PDK1                                                          | 1.57        | 1.70        | 1.37 x10 <sup>-4</sup>        | 1.39        | 1.25        | 0.15                         |
| ROCK2                                                         | 0.83        | 0.80        | 0.069                         | 0.73        | 0.94        | 0.023                        |
| SLC16A1                                                       | 1.18        | 1.08        | 0.069                         | 0.87        | 0.84        | 0.99                         |
| <b>WISP2</b>                                                  | <b>0.39</b> | <b>0.43</b> | <b>8.90 x10<sup>-4</sup></b>  | <b>0.31</b> | <b>0.59</b> | <b>0.0095</b>                |

4 Differential gene expression analysis of DCM-pRV/RVF and ICM-pRV/RVF compared to NF  
5 (normalized to 1) assessed for statistical significance using Benjamini-Hochberg corrected



- 1 Kruskal-Wallis p values. Genes with significant differential expression in both DCM and ICM
- 2 noted in bold.

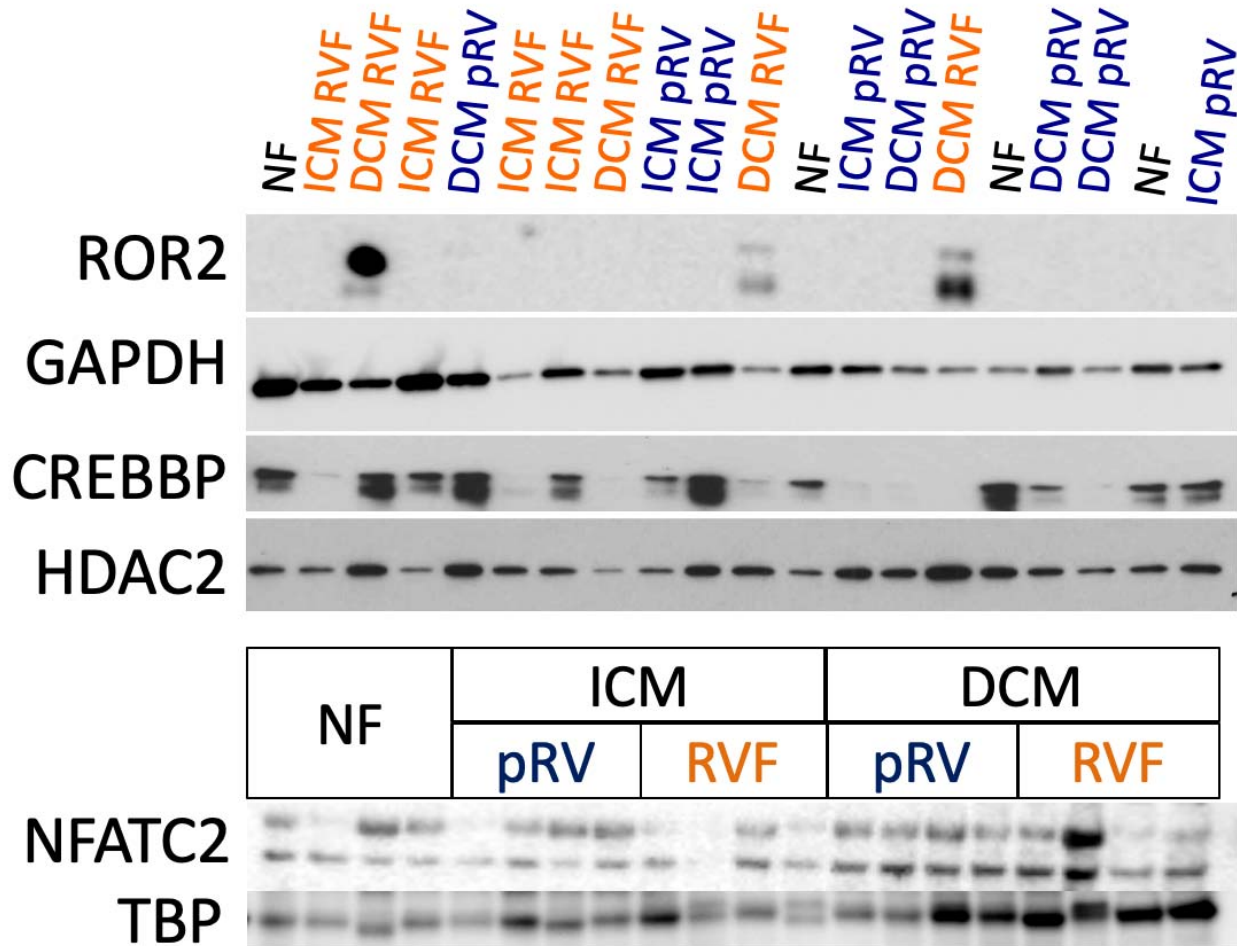

1 **Supplemental Figure 1**

- 2 Preliminary western blot analysis comparing four representative samples from each group using the highest and lowest RA:PCWP for RVF  
 3 and pRV, respectively, and the lowest NPPA expression for NF to represent the extremes of each group.
